# Supplementary material
Source: MDPI journal article supplement (https://www.mdpi.com/2073-4352/9/10/534)
Supplement: s1 [file s1]

|                          | Description                                                                      | Max Score | Total Score | Query Cover | E value | Per. Ident | Accession                      |
|--------------------------|----------------------------------------------------------------------------------|-----------|-------------|-------------|---------|------------|--------------------------------|
| <input type="checkbox"/> | pyridoxal kinase [Plasmodium falciparum 3D7]                                     | 209       | 348         | 100%        | 3e-63   | 100.00%    | <a href="#">XP_966146.1</a>    |
| <input type="checkbox"/> | pyridoxine kinase [Plasmodium falciparum IGH-CR14]                               | 164       | 164         | 92%         | 7e-46   | 89.19%     | <a href="#">KNG73950.1</a>     |
| <input type="checkbox"/> | hypothetical protein PFHG_00578 [Plasmodium falciparum HB3]                      | 160       | 258         | 100%        | 2e-44   | 86.09%     | <a href="#">KOB58829.1</a>     |
| <input type="checkbox"/> | hypothetical protein PFDG_04483 [Plasmodium falciparum Dd2]                      | 159       | 257         | 100%        | 3e-44   | 86.09%     | <a href="#">KOB88033.1</a>     |
| <input type="checkbox"/> | pyridoxal kinase [Plasmodium gaboni]                                             | 159       | 466         | 100%        | 6e-44   | 83.76%     | <a href="#">SOV12284.1</a>     |
| <input type="checkbox"/> | pyridoxal kinase [Plasmodium sp. DRC-Itaito]                                     | 143       | 279         | 99%         | 4e-38   | 79.44%     | <a href="#">SOV21668.1</a>     |
| <input type="checkbox"/> | pyridoxal kinase [Plasmodium reichenowi]                                         | 137       | 527         | 100%        | 7e-36   | 79.63%     | <a href="#">SOV77504.1</a>     |
| <input type="checkbox"/> | pyridoxal kinase [Plasmodium gaboni]                                             | 135       | 398         | 95%         | 4e-35   | 79.00%     | <a href="#">XP_018642797.1</a> |
| <input type="checkbox"/> | pyridoxal kinase [Plasmodium sp. gorilla clade G2]                               | 135       | 260         | 99%         | 5e-35   | 67.54%     | <a href="#">XP_028537308.1</a> |
| <input type="checkbox"/> | Beta-ketoacyl synthase [Beauveria brongniartii RCEF 3172]                        | 135       | 4732        | 100%        | 3e-34   | 73.11%     | <a href="#">QAA50030.1</a>     |
| <input type="checkbox"/> | hypothetical protein PENFLA_c125G03904 [Penicillium flavigenum]                  | 124       | 492         | 100%        | 2e-33   | 50.00%     | <a href="#">OQE08728.1</a>     |
| <input type="checkbox"/> | pyridoxal kinase [Plasmodium reichenowi]                                         | 125       | 125         | 81%         | 2e-31   | 78.57%     | <a href="#">CDO63349.1</a>     |
| <input type="checkbox"/> | pyridoxal kinase [Plasmodium falciparum Palo Alto/Uganda]                        | 124       | 308         | 90%         | 2e-31   | 89.16%     | <a href="#">ETW53186.1</a>     |
| <input type="checkbox"/> | hypothetical protein DUI87_24655 [Hirundo rustica rustica]                       | 115       | 342         | 100%        | 1e-30   | 42.86%     | <a href="#">RMB98441.1</a>     |
| <input type="checkbox"/> | PREDICTED: keratin-associated protein 6-2-like [Octopus bimaculoides]            | 119       | 1474        | 100%        | 1e-30   | 35.83%     | <a href="#">XP_014785252.1</a> |
| <input type="checkbox"/> | Compactin diketide synthase mokB [Beauveria bassiana]                            | 121       | 528         | 100%        | 2e-29   | 62.18%     | <a href="#">PMB69322.1</a>     |
| <input type="checkbox"/> | Lovastatin nonaketide synthase [Beauveria bassiana D1-5]                         | 120       | 410         | 100%        | 4e-29   | 61.67%     | <a href="#">KGQ12279.1</a>     |
| <input type="checkbox"/> | hypothetical protein BB8028_0003g08250 [Beauveria bassiana]                      | 119       | 566         | 100%        | 8e-29   | 63.03%     | <a href="#">PQK12208.1</a>     |
| <input type="checkbox"/> | Beta-ketoacyl synthase [Cordyceps confragosa RCEF 1005]                          | 116       | 851         | 100%        | 1e-27   | 62.18%     | <a href="#">QAA78033.1</a>     |
| <input type="checkbox"/> | hypothetical protein EN45_062540 [Penicillium chrysogenum]                       | 108       | 428         | 99%         | 1e-27   | 49.53%     | <a href="#">KZN87693.1</a>     |
| <input type="checkbox"/> | hypothetical protein EN45_063710 [Penicillium chrysogenum]                       | 106       | 422         | 100%        | 9e-27   | 50.00%     | <a href="#">KZN87810.1</a>     |
| <input type="checkbox"/> | pyridoxal kinase [Plasmodium falciparum Santa Lucia]                             | 112       | 461         | 100%        | 1e-26   | 87.34%     | <a href="#">EUT89866.1</a>     |
| <input type="checkbox"/> | hypothetical protein LLEC1_05370 [Cordyceps confragosa]                          | 113       | 953         | 100%        | 2e-26   | 58.82%     | <a href="#">QAR01380.1</a>     |
| <input type="checkbox"/> | putative membrane protein [Plasmodium reichenowi]                                | 110       | 1061        | 100%        | 1e-25   | 41.53%     | <a href="#">XP_012764852.2</a> |
| <input type="checkbox"/> | hypothetical protein LOTGIDRAFT_164889 [Lottia gigantea]                         | 104       | 708         | 100%        | 7e-25   | 40.16%     | <a href="#">XP_009059650.1</a> |
| <input type="checkbox"/> | conserved Plasmodium protein, unknown function [Plasmodium falciparum 3D7]       | 108       | 833         | 97%         | 9e-25   | 44.80%     | <a href="#">XP_002808861.1</a> |
| <input type="checkbox"/> | pyridoxal kinase [Plasmodium reichenowi]                                         | 107       | 211         | 87%         | 9e-25   | 77.38%     | <a href="#">XP_012761977.2</a> |
| <input type="checkbox"/> | Plasmodium exported protein (hyp4), unknown function [Plasmodium reichenowi]     | 105       | 555         | 100%        | 2e-24   | 49.57%     | <a href="#">SOV75054.1</a>     |
| <input type="checkbox"/> | hypothetical protein TSACC_21742 [Terrimicrobium sacchariphilum]                 | 98.2      | 648         | 99%         | 5e-24   | 66.29%     | <a href="#">GAT33328.1</a>     |
| <input type="checkbox"/> | N-acetyl-D-glucosamine kinase-like [Panaeus vannamei]                            | 105       | 600         | 95%         | 7e-24   | 69.39%     | <a href="#">XP_027208985.1</a> |
| <input type="checkbox"/> | Beta-ketoacyl synthase [Cordyceps fumosorosea ARSEF 2679]                        | 105       | 567         | 100%        | 1e-23   | 58.54%     | <a href="#">XP_018705471.1</a> |
| <input type="checkbox"/> | hypothetical protein PFHG_02530 [Plasmodium falciparum HB3]                      | 104       | 201         | 97%         | 2e-23   | 44.00%     | <a href="#">KOB60798.1</a>     |
| <input type="checkbox"/> | conserved Plasmodium membrane protein, unknown function [Plasmodium reichenowi]  | 104       | 583         | 100%        | 3e-23   | 50.81%     | <a href="#">SOV79843.1</a>     |
| <input type="checkbox"/> | splicing factor U2af large subunit A-like [Nilaparvata lugens]                   | 99.4      | 2582        | 100%        | 4e-23   | 42.50%     | <a href="#">XP_022198530.1</a> |
| <input type="checkbox"/> | hypothetical protein PFMG_01564 [Plasmodium falciparum IGH-CR14]                 | 102       | 297         | 97%         | 7e-23   | 44.00%     | <a href="#">KNG75333.1</a>     |
| <input type="checkbox"/> | pyridoxal kinase [Plasmodium sp. gorilla clade G3]                               | 101       | 474         | 96%         | 7e-23   | 67.09%     | <a href="#">SOV74700.1</a>     |
| <input type="checkbox"/> | Beta-ketoacyl synthase [Cordyceps militaris]                                     | 102       | 781         | 100%        | 1e-22   | 57.98%     | <a href="#">ATY60574.1</a>     |
| <input type="checkbox"/> | polyketide synthase, putative [Cordyceps militaris CM01]                         | 102       | 444         | 99%         | 1e-22   | 58.82%     | <a href="#">XP_006667589.1</a> |
| <input type="checkbox"/> | hypothetical protein, conserved [Plasmodium vivax]                               | 101       | 733         | 97%         | 2e-22   | 70.37%     | <a href="#">XP_001608467.1</a> |
| <input type="checkbox"/> | hypothetical protein EDD98_3099 [Streptomyces sp. PanSC19]                       | 99.4      | 1573        | 100%        | 2e-22   | 44.17%     | <a href="#">ROQ34065.1</a>     |
| <input type="checkbox"/> | conserved Plasmodium protein, unknown function [Plasmodium knowlesi strain H]    | 100       | 293         | 100%        | 5e-22   | 42.50%     | <a href="#">SBO23952.1</a>     |
| <input type="checkbox"/> | conserved Plasmodium protein, unknown function [Plasmodium gaboni]               | 100       | 375         | 100%        | 5e-22   | 62.07%     | <a href="#">SOV15009.1</a>     |
| <input type="checkbox"/> | lovastatin nonaketide synthase [Nannizzia gypsea CBS 118893]                     | 100       | 318         | 91%         | 6e-22   | 59.26%     | <a href="#">XP_003170591.1</a> |
| <input type="checkbox"/> | conserved Plasmodium protein, unknown function [Plasmodium sp. gorilla clade G3] | 99.8      | 425         | 98%         | 9e-22   | 58.06%     | <a href="#">SOV73987.1</a>     |
| <input type="checkbox"/> | exported protein family 3 [Plasmodium reichenowi]                                | 97.1      | 253         | 100%        | 1e-21   | 49.09%     | <a href="#">CDO62230.1</a>     |

Figure S1. BLAST results of the MNXH or TNXH repeats domain alignment, commonly shown in plasmodium genome.
